# Supplementary material for: Multiple Timescale Dynamic Analysis of Functionally-Impairing Mutations in Human Ileal Bile Acid-Binding Protein
Source: MDPI journal article supplement (doi:10.3390/ijms231911346), 2022-09-26
Supplement: s1 [file s1]

# Multiple Timescale Dynamic Analysis of Functionally-Impairing Mutations in Human Ileal Bile Acid-Binding Protein

Gergő Horváth <sup>1</sup>, Bence Balterer <sup>1</sup>, András Micsonai <sup>2</sup>, József Kardos <sup>2</sup> and Orsolya Toke <sup>1,\*</sup>

<sup>1</sup> NMR Research Laboratory, Centre for Structural Science, Research Centre for Natural Sciences, 2 Magyar tudósok körútja, H-1117 Budapest, Hungary

<sup>2</sup> ELTE NAP Neuroimmunology Research Group, Department of Biochemistry, Institute of Biology, ELTE Eötvös Loránd University, Pázmány Péter sétány 1/C, H-1117 Budapest, Hungary

\* Correspondence: [toke.orsolya@ttk.hu](mailto:toke.orsolya@ttk.hu); Tel.: +36-1-382-6575

## Supplementary Information

**Table S1.** Unfolding parameters of thermal denaturation experiments followed by CD

| pH  | WT         |                          | Q51A       |                          | Q99A       |                          |
|-----|------------|--------------------------|------------|--------------------------|------------|--------------------------|
|     | $T_m$ (°C) | $\Delta H$<br>(kcal/mol) | $T_m$ (°C) | $\Delta H$<br>(kcal/mol) | $T_m$ (°C) | $\Delta H$<br>(kcal/mol) |
| 5.8 | 58.4±0.1   | 85.4±2.0                 | 57.2±0.1   | 83.7±1.4                 | 57.5±0.1   | 87.3±1.9                 |
| 6.3 | 58.9±0.1   | 80.9±1.7                 | 57.3±0.1   | 79.5±1.9                 | 57.9±0.1   | 82.1±1.6                 |
| 8.0 | 59.0±0.1   | 89.4±2.0                 | 56.8±0.1   | 90.5±2.1                 | 57.5±0.1   | 82.7±1.8                 |

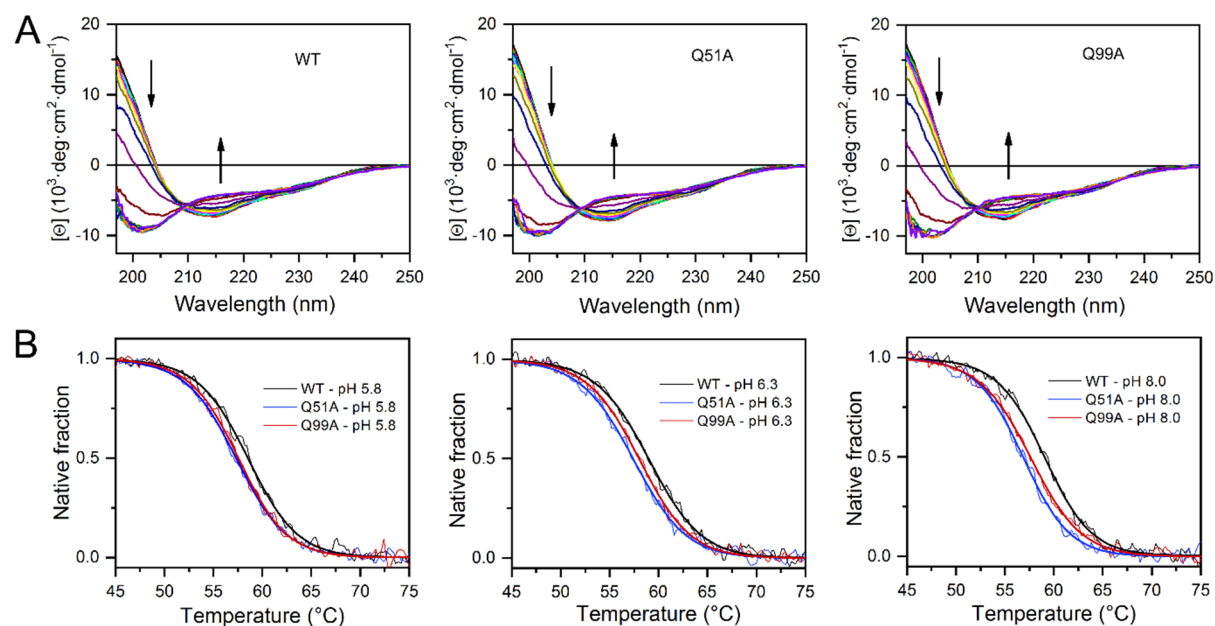**Figure S1.** Thermal denaturation of *apo* human I-BABP variants followed by CD spectroscopy. (A) CD spectra were recorded at 5 °C steps from 20 to 85 °C. Arrows show the direction of changes. (B) Thermal denaturation of I-BABP variants using continuous heating with a rate of 2 °C/min was followed by the CD signal at 200 nm at pH 5.8, 6.3, and 8.0.

**Table S2** Motional parameters derived from Model Free analysis of  $^{15}\text{N}$  backbone relaxation measurements obtained for WT, Q51A, and Q99A human I-BABP in 20 mM K-phosphate, 50 mM KCl, 0.05%  $\text{NaN}_3$ , 10%  $\text{D}_2\text{O}$ , pH=6.3 at 283 K.

| Residue | WT        |          |          | Q51A      |          |          | Q99A      |          |          |
|---------|-----------|----------|----------|-----------|----------|----------|-----------|----------|----------|
|         | $S^2$     | $R_{ex}$ | $\tau_e$ | $S^2$     | $R_{ex}$ | $\tau_e$ | $S^2$     | $R_{ex}$ | $\tau_e$ |
| 3       | 0.91±0.02 |          | 1581±353 | 0.84±0.02 |          | 1691±291 | 0.86±0.02 |          | 1106±204 |
| 4       | 0.94±0.02 |          |          | 0.99±0.02 |          |          | 0.94±0.02 |          |          |
| 5       | 0.84±0.02 | 1.8±0.3  |          | 0.92±0.02 |          |          | 0.88±0.02 |          |          |
| 6       | 0.98±0.02 |          |          | 0.98±0.02 |          |          | 0.93±0.02 |          |          |
| 7       | 0.97±0.02 |          |          | 0.92±0.02 |          | 1974±210 | 0.96±0.02 |          |          |
| 8       | 0.98±0.02 |          |          | 0.98±0.02 |          |          | N/A       |          |          |
| 9       | 0.98±0.02 |          |          | 0.87±0.02 |          | 1855±307 | 0.93±0.02 |          |          |
| 10      | 0.99±0.02 |          |          | 0.98±0.02 |          |          | 0.95±0.02 |          |          |
| 11      | 0.95±0.02 |          | 1988±211 | N/A       |          |          | 0.96±0.02 |          | 515±115  |
| 12      | 0.93±0.02 |          |          | 0.97±0.02 |          |          | 0.97±0.02 |          |          |
| 13      | 0.84±0.02 | 1.1±0.2  |          | 0.80±0.02 | 1.7±0.3  |          | 0.85±0.02 |          |          |
| 14      | 0.98±0.02 |          |          | N/A       |          |          | 0.98±0.02 |          |          |
| 15      | 0.91±0.02 |          |          | 0.94±0.02 |          |          | 0.95±0.02 |          |          |
| 16      | 0.82±0.02 | 1.8±0.3  |          | 0.89±0.02 |          |          | 0.93±0.02 |          |          |
| 17      | 0.86±0.02 | 2.1±0.3  |          | 0.94±0.02 | 2.1±0.3  |          | 0.96±0.02 |          |          |
| 18      | 0.94±0.02 |          |          | 0.94±0.02 |          |          | 0.93±0.02 |          |          |
| 19      | 0.89±0.02 | 1.5±0.2  |          | 0.93±0.02 |          |          | 0.91±0.02 |          |          |
| 20      | 0.80±0.02 | 3.4±0.3  |          | 0.86±0.02 |          |          | 0.90±0.02 |          |          |
| 21      | 0.79±0.02 | 2.8±0.3  |          | 0.83±0.02 | 1.6±0.3  |          | 0.90±0.02 |          |          |
| 22      | 0.82±0.02 | 1.3±0.2  |          | 0.82±0.02 |          |          | 0.85±0.02 |          |          |
| 23      | 0.90±0.02 |          |          | N/A       |          |          | 0.88±0.02 |          |          |
| 24      | 0.89±0.02 |          |          | 0.87±0.02 |          |          | 0.89±0.02 |          |          |
| 25      | 0.98±0.02 |          |          | 0.99±0.02 |          |          | 0.98±0.03 |          |          |
| 26      | 0.91±0.02 |          | 1933±302 | N/A       |          |          | 0.89±0.02 |          | 1839±239 |
| 27      | 0.89±0.02 | 1.5±0.3  |          | 0.89±0.02 |          |          | 0.90±0.02 |          |          |
| 28      | 0.91±0.02 | 1.3±0.3  |          | 0.96±0.02 |          |          | N/A       |          |          |
| 29      | 0.86±0.02 | 3.4±0.3  |          | N/A       |          |          | 0.95±0.03 | 3.1±0.3  |          |
| 30      | 0.82±0.02 | 1.6±0.3  |          | 0.90±0.02 | 2.3±0.3  |          | N/A       |          |          |
| 31      | 0.90±0.02 | 2.8±0.3  |          | 0.99±0.02 |          |          | N/A       |          |          |
| 32      | 0.99±0.02 | 2.0±0.3  |          | N/A       |          |          | 0.98±0.03 | 1.8±0.3  |          |
| 33      | 0.98±0.02 |          |          | 0.85±0.02 |          | 1911±224 | 0.98±0.02 |          |          |
| 34      | 0.98±0.02 |          |          | 0.89±0.02 |          | 1861±251 | 0.91±0.02 |          | 1104±181 |
| 35      | 0.89±0.02 | 4.3±0.3  |          | 0.98±0.02 |          |          | 0.86±0.03 | 5.9±0.4  |          |
| 36      | 0.98±0.00 | 6.4±0.3  |          | N/A       |          |          | 0.95±0.02 |          |          |
| 37      | 0.98±0.02 |          |          | 0.94±0.02 |          | 1753±304 | 0.96±0.02 |          |          |
| 38      | 0.97±0.02 |          |          | 0.88±0.02 |          | 1961±274 | 0.85±0.02 |          | 1904±361 |
| 39      | 0.98±0.02 |          |          | 0.97±0.02 |          |          | 0.91±0.02 |          | 1158±294 |
| 40      | 0.90±0.02 | 1.4±0.3  |          | 0.93±0.02 |          |          | 0.94±0.02 |          |          |
| 41      | 0.91±0.02 |          |          | 0.99±0.02 |          |          | N/A       |          |          |
| 42      | 0.95±0.02 |          |          | N/A       |          |          | N/A       |          |          |
| 43      | 0.91±0.02 |          |          | 0.93±0.02 |          |          | N/A       |          |          |
| 44      | 0.90±0.02 |          |          | N/A       |          |          | 0.87±0.02 |          |          |
| 45      | 0.83±0.02 |          |          | 0.85±0.02 |          |          | 0.83±0.02 |          |          |
| 46      | 0.95±0.02 |          |          | 0.94±0.02 |          |          | 0.93±0.02 |          |          |
| 47      | 0.94±0.02 |          |          | 0.97±0.02 |          |          | 0.93±0.02 |          |          |
| 48      | 0.90±0.02 |          |          | 0.97±0.02 |          |          | 0.93±0.02 |          |          |
| 49      | 0.98±0.02 |          |          | 0.98±0.02 |          |          | 1.00±0.02 |          |          |
| 50      | 0.99±0.02 |          |          | N/A       |          |          | 0.98±0.02 |          |          |
| 51      | 0.95±0.02 |          | 1891±322 | N/A       |          |          | 0.91±0.02 |          | 1961±255 |

|     |           |         |          |           |         |          |           |          |          |
|-----|-----------|---------|----------|-----------|---------|----------|-----------|----------|----------|
| 52  | 0.99±0.02 |         |          | 0.98±0.02 |         |          | 0.98±0.03 |          |          |
| 53  | 0.98±0.02 |         |          | N/A       |         |          | N/A       |          |          |
| 54  | 0.85±0.02 |         | 1810±271 | 0.94±0.02 |         |          | 0.84±0.02 |          | 1443±191 |
| 55  | 0.98±0.02 |         |          | 0.98±0.02 |         |          | 0.99±0.03 |          |          |
| 56  | 0.87±0.02 |         | 88±21    | N/A       |         |          | 0.88±0.02 |          | 89±34    |
| 58  | 0.98±0.02 |         |          | 0.98±0.02 |         |          | 0.98±0.03 |          |          |
| 59  | 0.87±0.02 |         | 1906±290 | 0.82±0.02 |         | 1881±244 | 0.85±0.02 |          | 1968±286 |
| 60  | 0.94±0.02 |         | 1518±243 | 0.82±0.04 | 1.1±0.2 | 1630±305 | 0.85±0.02 |          | 1755±251 |
| 61  | 0.97±0.02 |         |          | 0.89±0.02 |         | 1902±288 | 0.99±0.02 |          |          |
| 62  | 0.79±0.02 | 1.4±0.3 |          | 0.88±0.02 |         |          | 0.90±0.02 |          |          |
| 63  | 0.98±0.02 |         |          | 0.99±0.02 |         |          | 0.94±0.02 |          |          |
| 64  | 0.98±0.02 |         |          | 0.87±0.02 |         | 1769±320 | 0.98±0.02 |          |          |
| 65  | 0.93±0.02 |         |          | 0.94±0.02 |         |          | 0.95±0.02 |          |          |
| 66  | 0.93±0.02 |         |          | 0.99±0.02 |         |          | 0.82±0.03 | 2.4±0.3  |          |
| 67  | 0.96±0.02 |         | 1821±345 | 0.89±0.02 |         | 1922±341 | 0.98±0.02 |          |          |
| 68  | 0.91±0.02 |         |          | 0.88±0.02 |         | 68±20    | N/A       |          |          |
| 69  | 0.88±0.02 |         | 1877±309 | 0.99±0.02 |         |          | 0.98±0.02 |          |          |
| 70  | N/A       |         |          | N/A       |         |          | 0.64±0.03 |          | 2062±233 |
| 71  | 0.88±0.02 |         |          | 0.88±0.02 |         |          | 0.87±0.02 |          |          |
| 72  | 0.85±0.02 | 1.4±0.2 |          | 0.92±0.02 |         |          | 0.95±0.02 |          |          |
| 73  | 0.98±0.02 |         |          | 0.98±0.02 |         |          | 0.92±0.03 | 3.7±0.3  |          |
| 74  | 0.99±0.02 |         |          | 0.98±0.02 |         |          | N/A       |          |          |
| 75  | 0.98±0.02 |         |          | 0.76±0.04 | 3.5±0.3 | 1918±256 | 0.98±0.02 |          |          |
| 76  | 0.98±0.02 |         |          | N/A       |         |          | 0.98±0.03 |          |          |
| 77  | 0.75±0.03 |         | 544±108  | 0.67±0.03 |         | 828±93   | 0.74±0.03 |          | 596±95   |
| 78  | 0.92±0.02 |         | 124±32   | N/A       |         |          | 0.90±0.02 |          | 123±21   |
| 79  | 0.86±0.02 | 1.2±0.3 |          | 0.96±0.02 |         |          | 0.90±0.02 |          |          |
| 80  | 0.77±0.02 | 1.7±0.3 |          |           |         |          | 0.90±0.02 |          |          |
| 81  | 0.89±0.02 |         |          | 0.87±0.02 |         |          | 0.93±0.02 |          |          |
| 82  | 0.92±0.02 |         |          | 0.97±0.02 |         |          | 0.92±0.02 |          |          |
| 83  | 0.89±0.02 |         | 1806±255 | 0.98±0.02 |         |          | 0.89±0.03 |          | 1913±208 |
| 84  | 0.83±0.02 | 1.3±0.2 |          | 0.89±0.02 |         |          | 0.92±0.02 |          |          |
| 85  | 0.73±0.02 | 2.4±0.3 |          | 0.84±0.02 |         |          | 0.84±0.02 |          |          |
| 86  | 0.83±0.02 |         |          | 0.86±0.02 |         | 59±21    | 0.85±0.02 |          |          |
| 87  | 0.98±0.02 |         |          | N/A       |         |          | 0.99±0.04 |          |          |
| 88  | 0.96±0.02 | 2.1±0.3 |          | 0.98±0.02 |         |          | 0.96±0.03 | 3.9±0.3  |          |
| 89  | 0.96±0.02 |         |          | 0.91±0.02 |         | 852±129  | 0.90±0.02 |          |          |
| 90  | 0.93±0.02 |         |          | 0.98±0.02 |         |          | 0.99±0.02 |          |          |
| 91  | 0.85±0.02 | 3.4±0.3 |          | 0.85±0.02 | 4.2±0.3 |          | N/A       |          |          |
| 92  | 0.96±0.02 |         |          | 0.99±0.02 |         |          | 0.86±0.03 | 1.8±0.3  |          |
| 93  | 0.87±0.02 |         |          | 0.88±0.02 |         |          | 0.84±0.03 | 1.9±0.3  |          |
| 94  | 0.90±0.02 |         |          | 0.96±0.02 |         |          | 0.84±0.02 |          |          |
| 96  | 0.85±0.02 | 5.6±0.3 |          | 0.87±0.02 | 6.2±0.3 |          | 0.92±0.03 | 11.1±0.4 |          |
| 97  | 0.88±0.02 |         |          | 0.90±0.02 |         |          | 0.79±0.03 | 4.4±0.3  |          |
| 98  | 0.98±0.02 | 2.3±0.3 |          | 0.98±0.00 | 3.9±0.3 |          | 0.98±0.00 | 6.8±0.3  |          |
| 99  | 0.98±0.02 |         |          | 0.98±0.02 |         |          | 0.98±0.02 |          |          |
| 100 | 0.99±0.02 |         |          | 0.99±0.02 |         |          | 0.99±0.02 |          |          |
| 101 | 0.89±0.02 |         |          | 0.98±0.02 |         |          | 0.97±0.02 |          |          |
| 102 | 0.99±0.02 |         |          | 0.98±0.02 |         |          | 0.98±0.02 |          |          |
| 103 | 0.92±0.02 |         |          | 0.87±0.02 | 1.3±0.2 |          | 0.91±0.02 |          |          |
| 104 | 0.86±0.02 | 1.6±0.3 |          | 0.93±0.02 |         |          | 0.85±0.03 | 1.6±0.3  |          |
| 105 | 0.98±0.02 |         |          | 0.98±0.02 |         |          | 0.98±0.02 |          |          |
| 106 | 0.93±0.02 |         |          | N/A       |         |          | N/A       |          |          |
| 107 | 0.91±0.02 |         |          | 0.92±0.02 |         | 121±29   | 0.89±0.02 |          |          |
| 108 | 0.86±0.02 | 1.8±0.3 |          | 0.95±0.02 |         | 1349±208 | 0.92±0.02 |          |          |
| 109 | 0.98±0.02 |         |          | 0.98±0.02 |         |          | 0.98±0.02 |          |          |

|     |           |  |          |           |         |          |           |         |          |
|-----|-----------|--|----------|-----------|---------|----------|-----------|---------|----------|
| 110 | 0.99±0.02 |  |          | 0.98±0.02 |         |          | 0.98±0.03 |         |          |
| 111 | 0.83±0.02 |  |          | 0.95±0.02 |         |          | 0.91±0.02 |         | 1613±    |
| 112 | 0.98±0.02 |  |          | N/A       |         |          | N/A       |         |          |
| 113 | 0.98±0.02 |  |          | 0.98±0.02 |         |          | 0.98±0.02 |         |          |
| 114 | 1.00±0.02 |  |          | 0.91±0.02 |         | 1907±259 | N/A       |         |          |
| 115 | 0.94±0.02 |  |          | 0.97±0.02 |         |          | 0.98±0.02 |         |          |
| 116 | 0.98±0.02 |  |          | 0.98±0.02 |         |          | 0.98±0.02 |         |          |
| 117 | 0.89±0.02 |  |          | 0.89±0.02 |         |          | 0.89±0.02 |         |          |
| 118 | 0.93±0.02 |  |          | 0.91±0.02 | 1.1±0.2 |          | 0.98±0.02 |         |          |
| 119 | 1.00±0.02 |  |          | N/A       |         |          | 0.91±0.03 | 1.9±0.3 |          |
| 120 | 0.99±0.02 |  |          | 0.96±0.02 |         |          | 0.88±0.03 | 2.6±0.3 |          |
| 121 | 0.98±0.02 |  |          | 0.99±0.02 |         |          | 0.92±0.02 |         |          |
| 122 | 0.98±0.02 |  |          | 0.98±0.02 |         |          | 0.98±0.02 |         |          |
| 123 | 0.99±0.02 |  |          | 0.98±0.02 |         |          | 0.99±0.03 |         |          |
| 124 | 0.97±0.02 |  |          | 0.98±0.02 |         |          | 0.96±0.02 |         |          |
| 125 | 0.92±0.02 |  |          | 0.85±0.02 |         | 1133±256 | 0.92±0.02 |         |          |
| 126 | 0.87±0.02 |  |          | 0.89±0.02 |         |          | 0.88±0.02 |         |          |
| 127 | 0.68±0.03 |  | 1017±344 | 0.61±0.03 |         | 1423±418 | 0.63±0.03 |         | 1413±377 |

**Table S3** Exchange parameters derived from global fit analysis of  $^{15}\text{N}$  relaxation dispersion curves obtained for [80%  $^2\text{H}$ , 99%  $^{15}\text{N}$ -labeled] WT and Q99A human I-BABP in 20 mM K-phosphate, 50 mM KCl, 0.05%  $\text{NaN}_3$ , 10%  $\text{D}_2\text{O}$ , pH=6.3 at 283 K, 287 K, and 291 K. Parameters obtained for residues in cluster II in case of the wild-type protein are shown in blue.

| Residue | WT      |               |                           |                     | Q99A    |               |                           |                     |
|---------|---------|---------------|---------------------------|---------------------|---------|---------------|---------------------------|---------------------|
|         | $T$ (K) | $R_{ex}$ (Hz) | $\Phi$ (Hz <sup>2</sup> ) | $\Delta\omega$ (Hz) | $T$ (K) | $R_{ex}$ (Hz) | $\Phi$ (Hz <sup>2</sup> ) | $\Delta\omega$ (Hz) |
| E7      | 283     | 2.4±0.2       | 59±6                      | 44±3                | 283     |               |                           |                     |
|         | 287     | 2.5±0.2       | 74±6                      |                     | 287     |               |                           |                     |
|         | 291     | 2.0±0.2       | 81±7                      |                     | 291     |               |                           |                     |
| E11     | 283     | 3.1±0.2       | 62±8                      | 59±3                | 283     |               |                           |                     |
|         | 287     | 2.9±0.2       | 68±8                      |                     | 287     |               |                           |                     |
|         | 291     | 2.7±0.2       | 75±5                      |                     | 291     |               |                           |                     |
| N13     | 283     | 2.9±0.2       | 53±7                      | 55±3                | 283     |               |                           |                     |
|         | 287     | 2.5±0.2       | 59±7                      |                     | 287     |               |                           |                     |
|         | 291     | 2.4±0.2       | 64±5                      |                     | 291     |               |                           |                     |
| F17     | 283     | N/A           | N/A                       | 67±4                | 283     |               |                           |                     |
|         | 287     | N/A           | N/A                       |                     | 287     |               |                           |                     |
|         | 291     | 3.4±0.2       | 96±7                      |                     | 291     |               |                           |                     |
| K30     | 283     | N/A           | N/A                       | 43±4                | 283     |               |                           |                     |
|         | 287     | N/A           | N/A                       |                     | 287     |               |                           |                     |
|         | 291     | 1.5±0.2       | 39±4                      |                     | 291     |               |                           |                     |
| K35     | 283     | 3.6±0.2       | 96±12                     | 74±4                | 283     |               |                           |                     |
|         | 287     | 4.0±0.2       | 106±12                    |                     | 287     |               |                           |                     |
|         | 291     | 4.0±0.2       | 116±8                     |                     | 291     |               |                           |                     |
| I36     | 283     | N/A           | N/A                       | 71±3                | 283     |               |                           |                     |
|         | 287     | 3.8±0.2       | 99±11                     |                     | 287     |               |                           |                     |
|         | 291     | N/A           | N/A                       |                     | 291     |               |                           |                     |
| T38     | 283     | 2.5±0.2       | 40±5                      | 47±3                | 283     |               |                           |                     |

|     |     |          |        |       |     |         |        |      |
|-----|-----|----------|--------|-------|-----|---------|--------|------|
|     | 287 | 2.0±0.2  | 44±5   |       | 287 |         |        |      |
|     | 291 | N/A      | N/A    |       | 291 |         |        |      |
| E39 | 283 | N/A      | N/A    | 63±3  | 283 |         |        |      |
|     | 287 | 3.2±0.2  | 78±9   |       | 287 |         |        |      |
|     | 291 | 3.1±0.2  | 86±6   |       | 291 |         |        |      |
|     | 283 | 3.3±0.2  | 73±9   |       | 283 |         |        |      |
| V40 | 287 | 3.3±0.2  | 81±10  | 64±4  | 287 |         |        |      |
|     | 291 | 3.2±0.2  | 89±7   |       | 291 |         |        |      |
|     | 283 | N/A      | N/A    |       | 283 |         |        |      |
| H52 | 287 | 2.3±0.2  | 51±6   | 51±4  | 287 |         |        |      |
|     | 291 | 2.1±0.2  | 56±5   |       | 291 |         |        |      |
|     | 283 | N/A      | N/A    |       | 283 |         |        |      |
| Y53 | 287 | 2.4±0.2  | 54±7   | 52±4  | 287 |         |        |      |
|     | 291 | N/A      | N/A    |       | 291 |         |        |      |
|     | 283 | 3.5±0.2  | 85±11  |       | 283 |         |        |      |
| H57 | 287 | 3.7±0.2  | 94±11  | 69±4  | 287 |         |        |      |
|     | 291 | 3.6±0.2  | 103±8  |       | 291 |         |        |      |
|     | 283 | 3.6±0.3  | 89±11  |       | 283 | 1.1±0.2 | 41±4   | 37±3 |
| T58 | 287 | 3.5±0.2  | 98±11  | 68±3  | 287 | N/A     | N/A    |      |
|     | 291 | N/A      | N/A    |       | 291 | 2.0±0.2 | 54±7   |      |
|     | 283 | N/A      | N/A    |       | 283 |         |        |      |
| M59 | 287 | 3.4±0.2  | 81±8   | 64±2  | 287 |         |        |      |
|     | 291 | N/A      | N/A    |       | 291 |         |        |      |
|     | 283 | 3.6±0.2  | 97±12  |       | 283 | N/A     | N/A    | 53±4 |
| T60 | 287 | 4.1±0.2  | 108±12 | 74±4  | 287 | N/A     | N/A    |      |
|     | 291 | 4.0±0.2  | 118±8  |       | 291 | 2.6±0.3 | 110±10 |      |
|     | 283 | 3.4±0.2  | 82±10  |       | 283 | 2.5±0.3 | 64±8   | 46±5 |
| N61 | 287 | 3.6±0.2  | 91±10  | 68±3  | 287 | 2.2±0.3 | 72±9   |      |
|     | 291 | 3.5±0.2  | 100±6  |       | 291 | 2.0±0.2 | 84±10  |      |
|     | 283 | 3.6±0.2  | 91±12  |       | 283 | 3.6±0.3 | 96±10  | 57±5 |
| K62 | 287 | 3.9±0.3  | 101±12 | 72±5  | 287 | 3.6±0.2 | 109±11 |      |
|     | 291 | 3.8±0.2  | 111±9  |       | 291 | 3.3±0.3 | 126±13 |      |
|     | 283 | 2.3±0.2  | 36±5   |       | 283 |         |        |      |
| F63 | 287 | 1.8±0.2  | 40±5   | 45±3  | 287 |         |        |      |
|     | 291 | 1.7±0.2  | 44±4   |       | 291 |         |        |      |
|     | 283 | N/A      | N/A    |       | 283 |         |        |      |
| E68 | 287 | N/A      | N/A    | 75±5  | 287 |         |        |      |
|     | 291 | 5.4±0.3  | 234±19 |       | 291 |         |        |      |
|     | 283 | N/A      | N/A    |       | 283 |         |        |      |
| S69 | 287 | 2.5±0.2  | 74±6   | 44±3  | 287 |         |        |      |
|     | 291 | N/A      | N/A    |       | 291 |         |        |      |
|     | 283 | N/A      | N/A    |       | 283 |         |        |      |
| N70 | 287 | N/A      | N/A    | 55±3  | 287 |         |        |      |
|     | 291 | 2.9±     | 123±9  |       | 291 |         |        |      |
|     | 283 | 3.8±0.3  | 98±8   |       | 283 | N/A     | N/A    | 56±4 |
| I71 | 287 | 4.0±0.3  | 122±9  | 57±3  | 287 | N/A     | N/A    |      |
|     | 291 | 3.2±0.2  | 134±9  |       | 291 | 2.9±0.2 | 122±11 |      |
|     | 283 | 3.1±0.2  | 78±6   |       | 283 | 3.3±0.3 | 87±9   | 54±4 |
| Q72 | 287 | 3.3±0.2  | 98±6   | 51±2  | 287 | 3.0±0.3 | 99±9   |      |
|     | 291 | 2.6±0.2  | 107±7  |       | 291 | 2.7±0.2 | 115±10 |      |
|     | 283 | 14.4±0.2 | 677±49 |       | 283 | 8.3±0.3 | 271±27 | 95±7 |
| T73 | 287 | 18.1±0.2 | 845±52 | 150±5 | 287 | 8.3±0.3 | 309±29 |      |
|     | 291 | 17.7±0.2 | 928±53 |       | 291 | 7.9±0.3 | 358±32 |      |
|     | 283 | 5.5±0.2  | 152±13 |       | 283 |         |        |      |
| M74 | 287 | 5.9±0.2  | 190±14 | 71±4  | 287 |         |        |      |
|     | 291 | 4.8±0.2  | 208±15 |       | 291 |         |        |      |

|         |     |          |         |       |  |     |         |        |       |
|---------|-----|----------|---------|-------|--|-----|---------|--------|-------|
| T78     | 283 | 7.0±0.2  | 208±17  | 83±4  |  | 283 | N/A     | N/A    | 53±4  |
|         | 287 | 7.8±0.2  | 260±18  |       |  | 287 | 3.2±0.3 | 96±9   |       |
|         | 291 | 6.5±0.2  | 285±19  |       |  | 291 | 2.6±0.2 | 111±10 |       |
| A81     | 283 | 5.0±0.2  | 137±11  | 68±3  |  | 283 | N/A     | N/A    | 52±4  |
|         | 287 | 5.4±0.3  | 171±12  |       |  | 287 | 3.1±0.2 | 91±10  |       |
|         | 291 | 4.4±0.2  | 187±12  |       |  | 291 | 3.0±0.3 | 106±11 |       |
| T82     | 283 | 3.4±0.2  | 86±6    | 54±2  |  | 283 | 3.7±0.3 | 98±11  | 57±5  |
|         | 287 | 3.6±0.2  | 107±7   |       |  | 287 | 3.4±0.3 | 112±12 |       |
|         | 291 | 2.8±0.2  | 118±7   |       |  | 291 | 3.1±0.2 | 129±13 |       |
| V83     | 283 |          |         |       |  | 283 | N/A     | N/A    | 62±4  |
|         | 287 |          |         |       |  | 287 | N/A     | N/A    |       |
|         | 291 |          |         |       |  | 291 | 3.6±0.3 | 152±12 |       |
| G88     | 283 | 5.5±0.2  | 155±12  | 72±3  |  | 283 | 4.8±0.3 | 132±13 | 67±5  |
|         | 287 | 6.0±0.3  | 193±13  |       |  | 287 | 4.4±0.3 | 151±14 |       |
|         | 291 | 4.9±0.2  | 212±13  |       |  | 291 | 4.1±0.3 | 175±16 |       |
| K89     | 283 |          |         |       |  | 283 | N/A     | N/A    | 54±4  |
|         | 287 |          |         |       |  | 287 | N/A     | N/A    |       |
|         | 291 |          |         |       |  | 291 | 3.3±0.3 | 116±10 |       |
| L90     | 283 | 2.5±0.2  | 61±6    | 45±3  |  | 283 |         |        |       |
|         | 287 | 2.6±0.2  | 76±6    |       |  | 287 |         |        |       |
|         | 291 | N/A      | N/A     |       |  | 291 |         |        |       |
| V91     | 283 | 16.6±0.2 | 953±65  | 178±4 |  | 283 | N/A     | N/A    | 60±4  |
|         | 287 | 21.8±0.2 | 1189±67 |       |  | 287 | N/A     | N/A    |       |
|         | 291 | 22.6±0.2 | 1305±67 |       |  | 291 | 3.4±0.3 | 144±12 |       |
| V92     | 283 | N/A      | N/A     | 46±3  |  | 283 | 4.6±0.3 | 129±13 | 66±5  |
|         | 287 | 2.7±0.3  | 80±7    |       |  | 287 | 4.3±0.2 | 147±14 |       |
|         | 291 | N/A      | N/A     |       |  | 291 | 4.0±0.3 | 170±15 |       |
| N93     | 283 | N/A      | N/A     | 56±4  |  | 283 |         |        |       |
|         | 287 | 3.9±0.2  | 117±10  |       |  | 287 |         |        |       |
|         | 291 | 3.1±0.2  | 129±11  |       |  | 291 |         |        |       |
| F94     | 283 | N/A      | N/A     | 48±3  |  | 283 |         |        |       |
|         | 287 | N/A      | N/A     |       |  | 287 |         |        |       |
|         | 291 | 2.3±0.2  | 95±7    |       |  | 291 |         |        |       |
| N96     | 283 | 11.4±0.2 | 431±35  | 120±6 |  | 283 |         |        |       |
|         | 287 | 13.6±0.3 | 537±38  |       |  | 287 |         |        |       |
|         | 291 | 12.3±0.2 | 590±40  |       |  | 291 |         |        |       |
| Y97     | 283 | 6.6±0.2  | 193±16  | 80±4  |  | 283 | 5.3±0.3 | 152±13 | 71±4  |
|         | 287 | 7.3±0.2  | 241±17  |       |  | 287 | 5.0±0.3 | 174±14 |       |
|         | 291 | 6.1±0.2  | 265±18  |       |  | 291 | 4.6±0.2 | 201±15 |       |
| H98     | 283 | 10.5±0.2 | 376±30  | 112±5 |  | 283 | N/A     | N/A    | 67±4  |
|         | 287 | 12.3±0.2 | 469±32  |       |  | 287 | 4.4±0.3 | 151±12 |       |
|         | 291 | 11.0±0.2 | 515±33  |       |  | 291 | 4.1±0.2 | 174±13 |       |
| Q99/A99 | 283 | 6.2±0.2  | 179±15  | 77±4  |  | 283 |         |        |       |
|         | 287 | 6.8±0.2  | 223±16  |       |  | 287 |         |        |       |
|         | 291 | 5.6±0.2  | 245±17  |       |  | 291 |         |        |       |
| T100    | 283 | 5.3±0.2  | 147±11  | 70±3  |  | 283 | 9.6±0.3 | 331±29 | 105±6 |
|         | 287 | 5.8±0.2  | 183±12  |       |  | 287 | 9.7±0.3 | 377±30 |       |
|         | 291 | 4.7±0.3  | 201±13  |       |  | 291 | 9.4±0.3 | 436±33 |       |
| S101    | 283 | 4.8±0.2  | 130±10  | 66±3  |  | 283 | 2.5±0.3 | 64±7   | 46±4  |
|         | 287 | 5.2±0.2  | 162±11  |       |  | 287 | 2.3±0.3 | 73±8   |       |
|         | 291 | 4.2±0.2  | 177±12  |       |  | 291 | 2.0±0.2 | 85±8   |       |
| E102    | 283 | 3.3±0.2  | 84±7    | 53±3  |  | 283 | 2.4±0.3 | 61±6   | 45±3  |
|         | 287 | 3.5±0.2  | 105±8   |       |  | 287 | 2.2±0.2 | 70±6   |       |
|         | 291 | 2.7±0.2  | 115±8   |       |  | 291 | 1.9±0.2 | 81±7   |       |
| G105    | 283 | N/A      | N/A     | 52±2  |  | 283 |         |        |       |
|         | 287 | N/A      | N/A     |       |  | 287 |         |        |       |

|      |     |         |        |      |  |     |         |        |      |
|------|-----|---------|--------|------|--|-----|---------|--------|------|
|      | 291 | 2.6±0.2 | 110±7  |      |  | 291 |         |        |      |
| V109 | 283 | 3.5±0.2 | 90±9   | 55±4 |  | 283 |         |        |      |
|      | 287 | 3.7±0.2 | 112±10 |      |  | 287 |         |        |      |
|      | 291 | 2.9±0.2 | 123±11 |      |  | 291 |         |        |      |
| E110 | 283 | 3.7±0.2 | 96±8   | 57±3 |  | 283 |         |        |      |
|      | 287 | 3.9±0.2 | 120±9  |      |  | 287 |         |        |      |
|      | 291 | 3.1±0.2 | 132±9  |      |  | 291 |         |        |      |
| V111 | 283 |         |        |      |  | 283 | N/A     | N/A    | 66±4 |
|      | 287 |         |        |      |  | 287 | N/A     | N/A    |      |
|      | 291 |         |        |      |  | 291 | 4.0±0.3 | 172±13 |      |
| T113 | 283 | 2.2±0.2 | 54±5   | 43±3 |  | 283 | 2.0±0.2 | 51±5   | 41±3 |
|      | 287 | 2.3±0.2 | 68±6   |      |  | 287 | 1.8±0.2 | 58±5   |      |
|      | 291 | 1.8±0.2 | 75±6   |      |  | 291 | 1.6±0.2 | 67±6   |      |
| G115 | 283 | 2.6±0.2 | 64±6   | 46±3 |  | 283 |         |        |      |
|      | 287 | 2.7±0.3 | 80±7   |      |  | 287 |         |        |      |
|      | 291 | 2.1±0.2 | 88±7   |      |  | 291 |         |        |      |
| Y119 | 283 | 3.1±0.3 | 78±8   | 51±4 |  | 283 | N/A     | N/A    | 57±4 |
|      | 287 | 3.3±0.2 | 98±9   |      |  | 287 | 3.6±0.2 | 113±10 |      |
|      | 291 | 2.6±0.2 | 107±10 |      |  | 291 | 4.0±0.4 | 128±14 |      |
| R121 | 283 | 3.8±0.3 | 98±8   | 57±3 |  | 283 | 3.7±0.3 | 98±9   | 57±4 |
|      | 287 | 4.0±0.3 | 122±9  |      |  | 287 | N/A     | N/A    |      |
|      | 291 | N/A     | N/A    |      |  | 291 | N/A     | N/A    |      |
| V122 | 283 | N/A     | N/A    | 55±2 |  | 283 | N/A     | N/A    | 58±4 |
|      | 287 | N/A     | N/A    |      |  | 287 | 3.4±0.2 | 113±10 |      |
|      | 291 | 3.0±0.2 | 126±7  |      |  | 291 | N/A     | N/A    |      |



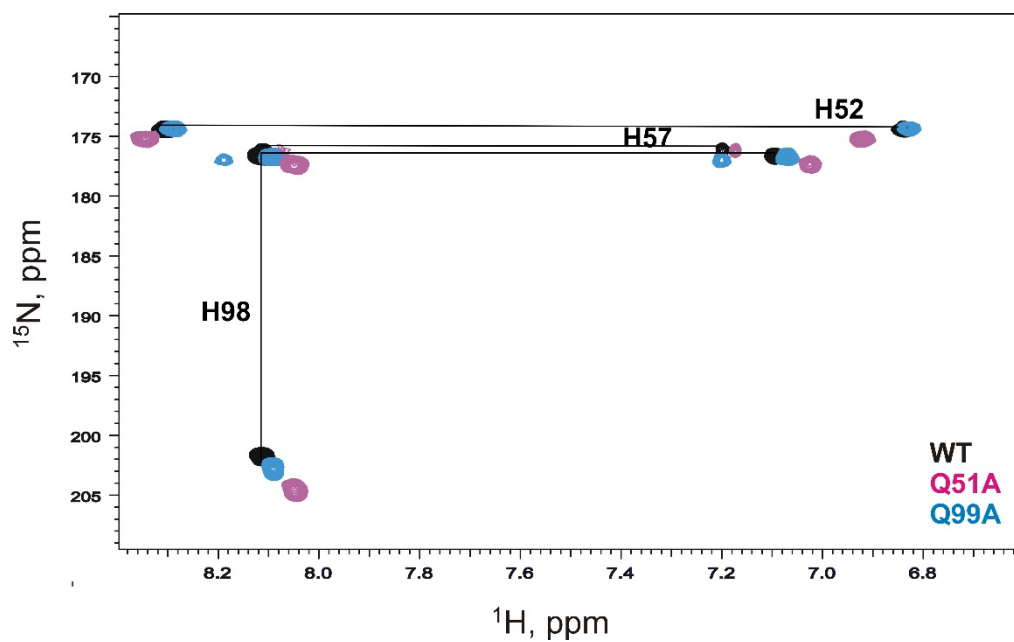

**Figure S2.**  $^1\text{H}$ - $^{15}\text{N}$  long-range HSQC spectra of WT, Q51A, and Q99A *apo* human I-BABP at pH 6.3, 10 °C correlating histidine  $^{15}\text{N}_{\delta 1}$  and  $^{15}\text{N}_{\epsilon 2}$  chemical shifts with nonexchangeable C-H ring protons. The similar pattern of chemical shifts obtained for the three variants indicates no significant mutation-induced change in the tautomer equilibria of histidines.
